# Supplementary material
Source: PubMed Central journal article supplement (PMC3271129)
Supplement: NIHMS342183-supplement-1.pdf [file NIHMS342183-supplement-1.pdf]

Supplemental Table 1. Cell lines analyzed in mutational screening.

| Cell Line Name | Tumor Type | Translocation   |
|----------------|------------|-----------------|
| JN-DSRCT       | DSRCT      | EWS-WT1         |
| A4573          | EFT        | EWS-FLI1 type 3 |
| A673           | EFT        | EWS-FLI1 type 1 |
| RD-ES          | EFT        | EWS-FLI1 type 2 |
| SKES1          | EFT        | EWS-FLI1 type 2 |
| SKPNDW         | EFT        | EWS-FLI1 type 1 |
| TC32           | EFT        | EWS-FLI1 type 1 |
| TC71           | EFT        | EWS-FLI1 type 1 |
| Cado-ES        | EFT        | EWS-ERG         |
| 6647           | EFT        | EWS-FLI1 type 2 |
| MHH-ES-1       | EFT        | EWS-FLI1 type 2 |
| RMS559         | ERMS       | Negative        |
| RD             | ERMS       | Negative        |
| SMS-CTR        | ERMS       | Negative        |
| RH18C          | ARMS       | Negative        |
| CW9019         | ARMS       | PAX7-FKHR       |
| SCMC-RM2       | ARMS       | PAX3-FKHR       |
| RH28           | ARMS       | PAX3-FKHR       |
| RH30           | ARMS       | PAX3-FKHR       |
| TS-RM1         | ARMS       | PAX3-FKHR       |
| JR             | ARMS       | PAX3-FKHR       |
| RH-41          | ARMS       | PAX3-FKHR       |

Supplemental Table 2. Point mutations across all 29 interrogated genes listed in table 1.

| Gene | Amino Acid | Nucleotide     |
|------|------------|----------------|
| AKT1 | p.E17K     | c.49G>A        |
| AKT2 | p.E17K     | c.49G>A        |
| AKT3 | p.E17K     | c.49G>A        |
| ALK  | p.K1062M   | c.3184A>T      |
| ALK  | p.D1091N   | c.3271G>A      |
| ALK  | p.M1166R   | c.3497T>G      |
| ALK  | p.I1171N   | c.3512T>A      |
| ALK  | p.F1174I   | c.3520aTTC>A   |
| ALK  | p.F1174L   | c.3520aTTC>C   |
| ALK  | p.F1174V   | c.3520aTTC>GTC |
| ALK  | p.F1174C   | c.3521T>G      |
| ALK  | p.F1174L   | c.3522C>A      |
| ALK  | p.A1234T   | c.3700G>A      |
| ALK  | p.F1245V   | c.3733T>G      |
| ALK  | p.F1245C   | c.3734T>G      |
| ALK  | p.F1245L   | c.3735C>A      |
| ALK  | p.F1245L   | c.3735C>G      |
| ALK  | p.I1250T   | c.3749T>C      |
| ALK  | p.R1275Q   | c.3824G>A      |
| ALK  | p.Y1278S   | c.3832A>C      |
| BRAF | p.G464R    | c.1390G>C      |
| BRAF | p.G464E    | c.1391G>A      |
| BRAF | p.G464V    | c.1391G>T      |
| BRAF | p.S467A    | c.1399T>G      |
| BRAF | p.F468S    | c.1403T>C      |
| BRAF | p.F468C    | c.1403T>G      |
| BRAF | p.G469E    | c.1406G>A      |
| BRAF | p.G469A    | c.1406G>C      |
| BRAF | p.G469V    | c.1406G>T      |
| BRAF | p.L485F    | c.1455G>C      |
| BRAF | p.V487G    | c.1460T>G      |
| BRAF | p.K499E    | c.1495A>G      |
| BRAF | p.K499N    | c.1497A>C      |
| BRAF | p.E501K    | c.1501G>A      |
| BRAF | p.E501G    | c.1502A>G      |
| BRAF | p.E501V    | c.1502A>T      |
| BRAF | p.N580D    | c.1738A>G      |
| BRAF | p.N581D    | c.1741A>G      |
| BRAF | p.N581S    | c.1742A>G      |
| BRAF | p.N581I    | c.1742A>T      |

|        |         |           |
|--------|---------|-----------|
| BRAF   | p.N581K | c.1743T>A |
| BRAF   | p.D594G | c.1781A>G |
| BRAF   | p.D594V | c.1781A>T |
| BRAF   | p.F595L | c.1783T>C |
| BRAF   | p.F595S | c.1784T>C |
| BRAF   | p.F595L | c.1785T>A |
| BRAF   | p.F595L | c.1785T>G |
| BRAF   | p.G596R | c.1786G>C |
| BRAF   | p.G596D | c.1787G>A |
| BRAF   | p.G596V | c.1787G>T |
| BRAF   | p.V600M | c.1798G>A |
| BRAF   | p.V600E | c.1799T>A |
| BRAF   | p.V600A | c.1799T>C |
| BRAF   | p.V600G | c.1799T>G |
| BRAF   | p.T241P | c.721A>C  |
| BRAF   | p.T244P | c.730A>C  |
| BRAF   | p.A246P | c.736G>C  |
| BRAF   | p.Q257K | c.769C>A  |
| BRAF   | p.Q257R | c.770A>G  |
| BRAF   | p.Q262K | c.784C>A  |
| BRAF   | p.Q262R | c.785A>G  |
| CDK4   | p.R24C  | c.70C>T   |
| CDK4   | p.R24L  | c.71G>T   |
| CTNNB1 | p.G34E  | c.101G>A  |
| CTNNB1 | p.G34V  | c.101G>T  |
| CTNNB1 | p.S37T  | c.109T>A  |
| CTNNB1 | p.S37P  | c.109T>C  |
| CTNNB1 | p.S37A  | c.109T>G  |
| CTNNB1 | p.T41P  | c.121A>C  |
| CTNNB1 | p.T41A  | c.121A>G  |
| CTNNB1 | p.T41S  | c.121A>T  |
| CTNNB1 | p.T41N  | c.122C>A  |
| CTNNB1 | p.T41S  | c.122C>G  |
| CTNNB1 | p.T41I  | c.122C>T  |
| CTNNB1 | p.S45T  | c.133T>A  |
| CTNNB1 | p.S45P  | c.133T>C  |
| CTNNB1 | p.S45A  | c.133T>G  |
| CTNNB1 | p.S45Y  | c.134C>A  |
| CTNNB1 | p.S45C  | c.134C>G  |
| CTNNB1 | p.S45F  | c.134C>T  |
| CTNNB1 | p.D32A  | c.95A>C   |

|        |         |                    |
|--------|---------|--------------------|
| CTNNB1 | p.D32G  | c.95A>G            |
| CTNNB1 | p.D32V  | c.95A>T            |
| EGFR   | p.E709H | c.2125_2127GAA>CAT |
| EGFR   | p.E709K | c.2125G>A          |
| EGFR   | p.E709A | c.2126A>C          |
| EGFR   | p.E709G | c.2126A>G          |
| EGFR   | p.E709V | c.2126A>T          |
| EGFR   | p.G719S | c.2155G>A          |
| EGFR   | p.G719C | c.2155G>T          |
| EGFR   | p.G719D | c.2156G>A          |
| EGFR   | p.G719A | c.2156G>C          |
| EGFR   | p.D761N | c.2281G>A          |
| EGFR   | p.D761Y | c.2281G>T          |
| EGFR   | p.S768I | c.2303G>T          |
| EGFR   | p.R776C | c.2326C>T          |
| EGFR   | p.R776H | c.2327G>A          |
| EGFR   | p.T790M | c.2369C>T          |
| EGFR   | p.T854A | c.2560A>G          |
| EGFR   | p.L858M | c.2572C>A          |
| EGFR   | p.L858R | c.2573T>G          |
| EGFR   | p.L861Q | c.2582T>A          |
| EGFR   | p.L861R | c.2582T>G          |
| ERBB2  | p.V777L | c.2329G>T          |
| ERBB2  | p.L755S | c.2264T>C          |
| ERBB2  | p.D769H | c.2305G>C          |
| ERBB2  | p.V777M | c.2329G>A          |
| FGFR2  | p.N550K | c.1650T>A          |
| FGFR2  | p.N550K | c.1650T>G          |
| FGFR2  | p.S252W | c.755C>G           |
| FGFR3  | p.G370C | c.1108G>T          |
| FGFR3  | p.Y373C | c.1118A>G          |
| FGFR3  | p.K650Q | c.1948aA>C         |
| FGFR3  | p.K650E | c.1948aA>G         |
| FGFR3  | p.K650T | c.1949A>C          |
| FGFR3  | p.K650M | c.1949A>T          |
| FGFR3  | p.G697C | c.2089G>T          |
| FGFR3  | p.R248C | c.742C>T           |
| FGFR3  | p.S249C | c.746C>G           |
| FLT3   | p.D835N | c.2503G>A          |
| FLT3   | p.D835H | c.2503G>C          |
| FLT3   | p.D835Y | c.2503G>T          |

|      |         |           |
|------|---------|-----------|
| GNAQ | p.Q209L | c.626A>C  |
| GNAQ | p.Q209P | c.626A>T  |
| GNAQ | p.Q209H | c.627A>T  |
| HRAS | p.Q61K  | c.181C>A  |
| HRAS | p.Q61E  | c.181C>G  |
| HRAS | p.Q61P  | c.182A>C  |
| HRAS | p.Q61R  | c.182A>G  |
| HRAS | p.Q61L  | c.182A>T  |
| HRAS | p.Q61H  | c.183G>C  |
| HRAS | p.Q61H  | c.183G>T  |
| HRAS | p.G12S  | c.34G>A   |
| HRAS | p.G12R  | c.34G>C   |
| HRAS | p.G12C  | c.34G>T   |
| HRAS | p.G12D  | c.35G>A   |
| HRAS | p.G12A  | c.35G>C   |
| HRAS | p.G12V  | c.35G>T   |
| HRAS | p.G13S  | c.37G>A   |
| HRAS | p.G13R  | c.37G>C   |
| HRAS | p.G13C  | c.37G>T   |
| HRAS | p.G13D  | c.38G>A   |
| HRAS | p.G13V  | c.38G>T   |
| IDH1 | p.R132S | c.394C>A  |
| IDH1 | p.R132G | c.394C>G  |
| IDH1 | p.R132C | c.394C>T  |
| IDH1 | p.R132H | c.395aG>A |
| IDH1 | p.R132L | c.395bG>T |
| IDH2 | p.R172G | c.514A>G  |
| IDH2 | p.R172K | c.515G>A  |
| IDH2 | p.R172M | c.515G>T  |
| JAK2 | p.V617F | c.1849G>T |
| KIT  | p.V559D | c.1676T>A |
| KIT  | p.V559A | c.1676T>C |
| KIT  | p.V559G | c.1676T>G |
| KIT  | p.D816V | c.2446G>A |
| KIT  | p.D816H | c.2446G>C |
| KIT  | p.D816A | c.2447A>C |
| KIT  | p.D816G | c.2447A>G |
| KIT  | p.D816V | c.2447A>T |
| KRAS | p.Q61K  | c.181C>A  |
| KRAS | p.Q61E  | c.181C>G  |
| KRAS | p.Q61P  | c.182A>C  |

|        |          |                |
|--------|----------|----------------|
| KRAS   | p.Q61R   | c.182A>G       |
| KRAS   | p.Q61L   | c.182A>T       |
| KRAS   | p.Q61H   | c.183A>C       |
| KRAS   | p.Q61H   | c.183A>T       |
| KRAS   | p.G12S   | c.34G>A        |
| KRAS   | p.G12R   | c.34G>C        |
| KRAS   | p.G12C   | c.34G>T        |
| KRAS   | p.G12D   | c.35G>A        |
| KRAS   | p.G12A   | c.35G>C        |
| KRAS   | p.G12V   | c.35G>T        |
| KRAS   | p.G13S   | c.37G>A        |
| KRAS   | P.G13R   | c.37G>C        |
| KRAS   | p.G13C   | c.37G>T        |
| KRAS   | p.G13D   | c.38G>A        |
| KRAS   | p.G13A   | c.38G>C        |
| KRAS   | p.G13V   | c.38G>T        |
| KRAS   | p.A146T  | c.436G>A       |
| KRAS   | p.A146P  | c.436G>C       |
| KRAS   | p.A146V  | c.437C>T       |
| KRAS   | p.Q61K   | c180_181 TC>CA |
| KRAS   | p.K117N  | c351A>C        |
| KRAS   | p.K117N  | c351A>T        |
| MAP2K1 | p.Q56P   | c.167A>C       |
| MAP2K1 | p.K57N   | c.171G>T       |
| MAP2K1 | p.D67N   | c.199G>A       |
| MET    | p.Y1248C | c.3743A>G      |
| MET    | p.Y1253D | c.3757T>G      |
| MET    | p.M1268T | c.3803T>C      |
| NOTCH1 | p.L1575P | c.4724T>C      |
| NOTCH1 | p.L1586P | c.4757T>C      |
| NOTCH1 | p.L1594P | c.4781T>C      |
| NOTCH1 | p.R1599P | c.4796G>C      |
| NOTCH1 | p.L1601P | c.4802T>C      |
| NOTCH1 | p.L1679Q | c.5036T>A      |
| NOTCH1 | p.L1679P | c.5036T>C      |
| NOTCH1 | p.Q2460  | c.7378C>T      |
| NRAS   | p.Q61K   | c.181C>A       |
| NRAS   | p.Q61K   | c.181C>A       |
| NRAS   | p.Q61E   | c.181C>G       |
| NRAS   | p.Q61E   | c.181C>G       |
| NRAS   | p.Q61P   | c.182A>C       |

|        |         |           |
|--------|---------|-----------|
| NRAS   | p.Q61P  | c.182A>C  |
| NRAS   | p.Q61R  | c.182A>G  |
| NRAS   | p.Q61R  | c.182A>G  |
| NRAS   | p.Q61L  | c.182A>T  |
| NRAS   | p.Q61L  | c.182A>T  |
| NRAS   | p.Q61H  | c.183A>C  |
| NRAS   | p.Q61H  | c.183A>C  |
| NRAS   | p.Q61Q  | c.183A>G  |
| NRAS   | p.Q61H  | c.183A>T  |
| NRAS   | p.Q61H  | c.183A>T  |
| NRAS   | p.G12S  | c.34G>A   |
| NRAS   | p.G12S  | c.34G>A   |
| NRAS   | p.G12R  | c.34G>C   |
| NRAS   | p.G12R  | c.34G>C   |
| NRAS   | p.G12C  | c.34G>T   |
| NRAS   | p.G12C  | c.34G>T   |
| NRAS   | p.G12D  | c.35G>A   |
| NRAS   | p.G12D  | c.35G>A   |
| NRAS   | p.G12A  | c.35G>C   |
| NRAS   | p.G12A  | c.35G>C   |
| NRAS   | p.G12V  | c.35G>T   |
| NRAS   | p.G12V  | c.35G>T   |
| NRAS   | p.G13S  | c.37G>A   |
| NRAS   | p.G13S  | c.37G>A   |
| NRAS   | p.G13R  | c.37G>C   |
| NRAS   | p.G13R  | c.37G>C   |
| NRAS   | p.G13C  | c.37G>T   |
| NRAS   | p.G13C  | c.37G>T   |
| NRAS   | p.G13D  | c.38G>A   |
| NRAS   | p.G13D  | c.38G>A   |
| NRAS   | p.G13A  | c.38G>C   |
| NRAS   | p.G13A  | c.38G>C   |
| NRAS   | p.G13V  | c.38G>T   |
| NRAS   | p.G13V  | c.38G>T   |
| PDGFRA | p.V561D | c.1682T>A |
| PDGFRA | p.D842V | c.2525A>T |
| PIK3CA | p.N345K | c.1035T>A |
| PIK3CA | p.N345K | c.1035T>G |
| PIK3CA | p.C420R | c.1258T>C |
| PIK3CA | p.E542K | c.1624G>A |
| PIK3CA | p.E542Q | c.1624G>C |

|        |          |           |
|--------|----------|-----------|
| PIK3CA | p.E545K  | c.1633G>A |
| PIK3CA | p.E545Q  | c.1633G>C |
| PIK3CA | p.E545A  | c.1634A>C |
| PIK3CA | p.E545G  | c.1634A>G |
| PIK3CA | p.E545D  | c.1635G>T |
| PIK3CA | p.R88Q   | c.263G>A  |
| PIK3CA | p.M1043I | c.3129G>T |
| PIK3CA | p.H1047Y | c.3139C>T |
| PIK3CA | p.H1047R | c.3140A>G |
| PIK3CA | p.H1047L | c.3140A>T |
| PIK3R1 | p.D560Y  | c.1678G>T |
| PIK3R1 | p.N564K  | c.1692C>A |
| PIK3R1 | p.N564K  | c.1692C>G |
| PTPN11 | p.G60A   | c.179G>C  |
| PTPN11 | p.G60V   | c.179G>T  |
| PTPN11 | p.D61N   | c.181G>A  |
| PTPN11 | p.D61H   | c.181G>C  |
| PTPN11 | p.D61Y   | c.181G>T  |
| PTPN11 | p.D61G   | c.182A>G  |
| PTPN11 | p.D61V   | c.182A>T  |
| PTPN11 | p.A72T   | c.214G>A  |
| PTPN11 | p.E76K   | c.226G>A  |
| PTPN11 | p.E76Q   | c.226G>C  |
| PTPN11 | p.E76G   | c.227A>G  |
| PTPN11 | p.E76V   | c.227A>T  |
| PTPN11 | p.R152H  | c.455G>A  |
| RET    | p.M918T  | c.2753T>C |
| SMO    | p.W535L  | c.1604G>T |
| SMO    | p.T640A  | c.1918A>G |
| SMO    | p.R199W  | c.595C>T  |



Supplemental table 3. List of primers used in Sequenom MassArray mutation detection assay.

| Assay Name | 1st Primer                      | 2nd Primer                      | UEP                         |
|------------|---------------------------------|---------------------------------|-----------------------------|
| AKT1_49G   | ACGTTGGATGTAGAGTGTGCGTGGCTCTCA  | ACGTTGGATGTTGAGGAGGAAGTAGCGTGG  | CGCCAGGTCTTGATGTACT         |
| AKT2_49    | ACGTTGGATGGTGGCCTCCAGGTCTTGAT   | ACGTTGGATGCACTCAACCTTGCCTAACC   | CTTCTGCCTCATTTTCAGGT        |
| AKT3_49    | ACGTTGGATGAAAGGAAGTATCTTGGCCTC  | ACGTTGGATGGCATTAAACATGCGTGCTTTC | tgccTGCCTGCTTTCTCATGTAGGA   |
| ALK_3184   | ACGTTGGATGAGGCCATGTTGCAGCTGAC   | ACGTTGGATGAGCTCCATCTGCATGGCTTG  | agTGGCTTGAGCTCCTGGTGC       |
| ALK_3271   | ACGTTGGATGTCTTGCCAGCAAAGCAGTAG  | ACGTTGGATGCTGAGTACAAGCTGAGCAAG  | CCTCGACCATCATGACC           |
| ALK_3497   | ACGTTGGATGCTCTGTGGCTTTACCTGATG  | ACGTTGGATGTGAAGTGTGCTCTGAACAGG  | ctACGAACTGGATTTCTCA         |
| ALK_3512   | ACGTTGGATGTGAGGGTGTCTCTCTGTGG   | ACGTTGGATGAGTGTGCTCTGAACAGGACG  | cgCATGGAAGCCCTGATCA         |
| ALK_3520a  | ACGTTGGATGATTGCAGGCTCACCCCAATG  | ACGTTGGATGTTGGTTACATCCCTCTCTGC  | TCTCTGCTCTGCAGCAA           |
| ALK_3520b  | ACGTTGGATGATTGCAGGCTCACCCCAATG  | ACGTTGGATGTTGGTTACATCCCTCTCTGC  | CTCTCTGCTCTGCAGCAAAT        |
| ALK_3522   | ACGTTGGATGATTGCAGGCTCACCCCAATG  | ACGTTGGATGTTGGTTACATCCCTCTCTGC  | TCTCTGCTCTGCAGCAAAT         |
| ALK_3700   | ACGTTGGATGCGGTGGATGAAGTGGTTTTTC | ACGTTGGATGATGCTGGACCTTCTGCACG   | ccaaACGTGGCTCGGGACATT       |
| ALK_3733   | ACGTTGGATGATGACAGGAAGAGCACAGTC  | ACGTTGGATGGTGGCTGTCAGTATTTGGAG  | GTATTTGGAGGAAAACCAC         |
| ALK_3734   | ACGTTGGATGATGACAGGAAGAGCACAGTC  | ACGTTGGATGGTGGCTGTCAGTATTTGGAG  | cttTCAGTATTTGGAGGAAAACCACT  |
| ALK_3735   | ACGTTGGATGGTGGCTGTCAGTATTTGGAG  | ACGTTGGATGATGACAGGAAGAGCACAGTC  | agcatTTTGACTCACCGGTGGAT     |
| ALK_3749   | ACGTTGGATGACAGGTCAAGAGGCAGTTTTC | ACGTTGGATGCACTCATCTTCTAGGGATA   | ctcCCTTTCTTCCAGAGACA        |
| ALK_3824   | ACGTTGGATGTGAGGCAGTCTTTACTCACC  | ACGTTGGATGTGGCCAAGATTGGAGACTTC  | ttAGACTTCGGGATGGCCC         |
| ALK_3832   | ACGTTGGATGGGGTGAGGCAGTCTTTACT   | ACGTTGGATGTGGCCAAGATTGGAGACTTC  | gctGGATGGCCGAGACATCT        |
| BRAF_1390  | ACGTTGGATGTACTTACCATGCCACTTTCC  | ACGTTGGATGGGCAGATTACAGTGGGACAA  | ACAGTGGGACAAAGAATT          |
| BRAF_1391  | ACGTTGGATGTACTTACCATGCCACTTTCC  | ACGTTGGATGGGCAGATTACAGTGGGACAA  | CAGTGGGACAAAGAATTG          |
| BRAF_1399  | ACGTTGGATGTTACATACTTACCATGCCAC  | ACGTTGGATGCAGATTACAGTGGGACAAAG  | ACAAAGAATTGGATCTGGA         |
| BRAF_1403  | ACGTTGGATGTTACATACTTACCATGCCAC  | ACGTTGGATGCAGATTACAGTGGGACAAAG  | ggCAAAGAATTGGATCTGGATCAT    |
| BRAF_1406G | ACGTTGGATGTGGGCAGATTACAGTGGGAC  | ACGTTGGATGACTTACCATGCCACTTTCCC  | CACTTTCCCTTGACTACTGTT       |
| BRAF_1455  | ACGTTGGATGGAAGGCTTGTAACTGCTGAG  | ACGTTGGATGCCTTTTAGGTGATGTGGCAG  | gggcTGTGGCAGTGAAAATGTT      |
| BRAF_1460  | ACGTTGGATGGAAGGCTTGTAACTGCTGAG  | ACGTTGGATGCCTTTTAGGTGATGTGGCAG  | GCAGTGAAAATGTTGAATG         |
| BRAF_1495  | ACGTTGGATGAATGTGACAGCACCTACACC  | ACGTTGGATGAATTCACACAAGCTCACCTG  | TGAGTACTCTACTTCATTTT        |
| BRAF_1497  | ACGTTGGATGAATTCACACAAGCTCACCTG  | ACGTTGGATGAATGTGACAGCACCTACACC  | tccGCAGTTACAAGCCTTCAA       |
| BRAF_1501  | ACGTTGGATGAATTCACACAAGCTCACCTG  | ACGTTGGATGAATGTGACAGCACCTACACC  | CAGTTACAAGCCTTCAAAAAT       |
| BRAF_1502  | ACGTTGGATGAATGTGACAGCACCTACACC  | ACGTTGGATGAATTCACACAAGCTCACCTG  | CTCACCTGAGTACTCCTACT        |
| BRAF_1738  | ACGTTGGATGACTTACACGCCAAGTCAATC  | ACGTTGGATGCTTCGCAGACAAATTTTCAGG | AGACAAATTTTCAGGAAGGATACTAT  |
| BRAF_1741  | ACGTTGGATGACTTACACGCCAAGTCAATC  | ACGTTGGATGCTTCGCAGACAAATTTTCAGG | CAGACAAATTTTCAGGAAGGATAC    |
| BRAF_1742  | ACGTTGGATGATGAGATCTACTGTTTTCC   | ACGTTGGATGCCTATTTTTACTGTGAGGTC  | acttTGAGGTCTTCATGAAGAAATATA |
| BRAF_1743  | ACGTTGGATGCCTATTTTTACTGTGAGGTC  | ACGTTGGATGATGAGATCTACTGTTTTCC   | TCCTTTACTTACTACACCTCAGA     |

|               |                                 |                                 |                              |
|---------------|---------------------------------|---------------------------------|------------------------------|
| BRAF_1781A_Rb | ACGTTGGATGTCTTCATGAAGACCTCACAG  | ACGTTGGATGCCACTCCATCGAGATTTAC   | CACTGTAGCTAGACCAAAA          |
| BRAF_1783     | ACGTTGGATGACCCACTCCATCGAGATTTT  | ACGTTGGATGTCTTCATGAAGACCTCACAG  | CTCACAGTAAAAATAGGTGAT        |
| BRAF_1784     | ACGTTGGATGACCCACTCCATCGAGATTTT  | ACGTTGGATGTCTTCATGAAGACCTCACAG  | TCACAGTAAAAATAGGTGATT        |
| BRAF_1785     | ACGTTGGATGACCCACTCCATCGAGATTTT  | ACGTTGGATGTCTTCATGAAGACCTCACAG  | TCACAGTAAAAATAGGTGATTT       |
| BRAF_1786     | ACGTTGGATGACCCACTCCATCGAGATTTT  | ACGTTGGATGTCTTCATGAAGACCTCACAG  | CACAGTAAAAATAGGTGATTTT       |
| BRAF_1787     | ACGTTGGATGACCCACTCCATCGAGATTTT  | ACGTTGGATGTCTTCATGAAGACCTCACAG  | CTCACAGTAAAAATAGGTGATTTTG    |
| BRAF_1798G    | ACGTTGGATGATGGGACCCACTCCATCGAG  | ACGTTGGATGTCTTCATGAAGACCTCACAG  | GTGATTTTGGTCTAGCTACA         |
| BRAF_1799T_F  | ACGTTGGATGATGGGACCCACTCCATCGAG  | ACGTTGGATGTCTTCATGAAGACCTCACAG  | GGTGATTTTGGTCTAGCTACAG       |
| BRAF_1799T_R  | ACGTTGGATGATAGGTGATTTTGGTCTAGC  | ACGTTGGATGATGGATCCAGACAACCTGTTT | CCCACTCCATCGAGATTTT          |
| BRAF_721      | ACGTTGGATGCTGGAAAAGCAGCTTTTCGAC | ACGTTGGATGGTGATTTTTTACTTTGCAGG  | cccgTTTTACTTTGCAGGTACGAAAA   |
| BRAF_730      | ACGTTGGATGCTGGAAAAGCAGCTTTTCGAC | ACGTTGGATGCTTTGCAGGTACGAAAAACG  | tgccGGTACGAAAAACGTTTTTTC     |
| BRAF_736      | ACGTTGGATGCTGGAAAAGCAGCTTTTCGAC | ACGTTGGATGCTTTGCAGGTACGAAAAACG  | ctGTACGAAAAACGTTTTTTCACCTTA  |
| BRAF_769      | ACGTTGGATGGTACTACAACGCTGGTGA    | ACGTTGGATGGTGACTTTTGTGCAAGCTG   | GTCGAAAGCTGCTTTTTC           |
| BRAF_770      | ACGTTGGATGGCATTGTGACTTTTGTGCG   | ACGTTGGATGAACCACATGTTTGACAGCGG  | TGTTTGACAGCGGAAACCC          |
| BRAF_784      | ACGTTGGATGCAGTGGAACCTTCTGACTAC  | ACGTTGGATGAGCTGCTTTTCCAGGGTTT   | gatgTTCCAGGGTTTCCGCTGT       |
| BRAF_785      | ACGTTGGATGAGCTGCTTTTCCAGGGTTT   | ACGTTGGATGCAGTGGAACCTTCTGACTAC  | GGTGAAATTTATAACCACATGTT      |
| CDK4_70       | ACGTTGGATGAATTGGTGTGCGTGCCTATG  | ACGTTGGATGACTCTTGAGGGCCACAAAGT  | aGCCACTGTGGGGATCAC           |
| CDK4_71       | ACGTTGGATGACTCTTGAGGGCCACAAAGT  | ACGTTGGATGAATTGGTGTGCGTGCCTATG  | GACAGTGTACAAGGCC             |
| CTNNB1_101    | ACGTTGGATGTTACCACTCAGAGAAGGAGC  | ACGTTGGATGACTGGCAGCAACAGTCTTAC  | GTCTTACCTGGACTCTG            |
| CTNNB1_109    | ACGTTGGATGCAGGATTGCCTTTACCACTC  | ACGTTGGATGCAACAGTCTTACCTGGACTC  | ctgACCTGGACTCTGGAATCCAT      |
| CTNNB1_121    | ACGTTGGATGCAACAGTCTTACCTGGACTC  | ACGTTGGATGCAGGATTGCCTTTACCACTC  | CTCAGAGAAGGAGCTGTGG          |
| CTNNB1_122    | ACGTTGGATGCAACAGTCTTACCTGGACTC  | ACGTTGGATGCAGGATTGCCTTTACCACTC  | ccaaTCAGAGAAGGAGCTGTG        |
| CTNNB1_133    | ACGTTGGATGCATCCTCTTCCCTCAGGATTG | ACGTTGGATGCTCTGGAATCCATTCTGGTG  | gcttGTGCCACTACCACAGCTCCT     |
| CTNNB1_134    | ACGTTGGATGCTCTGGAATCCATTCTGGTG  | ACGTTGGATGCATCCTCTTCCCTCAGGATTG | ttccgCAGGATTGCCTTTACCACTCAGA |
| CTNNB1_95     | ACGTTGGATGGACAGAAAAGCGGCTGTTAG  | ACGTTGGATGGTGGTAGTGGCACCAGAATG  | ACCAGAATGGATTCCAGAG          |
| EGFR_2125G    | ACGTTGGATGTTACCTTATACACCGTGCCG  | ACGTTGGATGCCAACCAAGCTCTCTTGAGG  | GCTCTCTTGAGGATCTTGAAG        |
| EGFR_2126Aa   | ACGTTGGATGTTACCTTATACACCGTGCCG  | ACGTTGGATGCCAACCAAGCTCTCTTGAGG  | cccctCTCTCTTGAGGATCTTGAAGG   |
| EGFR_2155G    | ACGTTGGATGCCTTATACACCGTGCCGAAC  | ACGTTGGATGTCTCTTGAGGATCTTGAAGG  | cgGAATTCAAAAAGATCAAAGTGCTG   |
| EGFR_2156G_F  | ACGTTGGATGCCTTATACACCGTGCCGAAC  | ACGTTGGATGTCTCTTGAGGATCTTGAAGG  | cAAAAGATCAAAGTGCTGG          |
| EGFR_2156G_R  | ACGTTGGATGGAGGATCTTGAAGGAAACTG  | ACGTTGGATGCCTTACCTTATACACCGTGC  | ACACCGTGCCGAACGCACCGGAG      |
| EGFR_2281G    | ACGTTGGATGAGGTTCCAGAGCCATGGACCC | ACGTTGGATGCAACATCTCCGAAAGCCAAC  | AAAGCCAACAAGGAAATCCTC        |
| EGFR_2303G    | ACGTTGGATGCTCCAGGAAGCCTACGTGA   | ACGTTGGATGACGGTGGAGGTGAGGCAGAT  | gggAGGAAGCCTACGTGATGGCCA     |
| EGFR_2303G    | ACGTTGGATGCTCCAGGAAGCCTACGTGA   | ACGTTGGATGTGTTCCCGACATAGTCCAG   | CGTGGGGGTTGTCCACG            |
| EGFR_2326C    | ACGTTGGATGTCCAGGAAGCCTACGTGATG  | ACGTTGGATGATGAGCTGCGTGATGAGCTG  | GCAGATGCCAGCAGCG             |

|              |                                |                                |                              |
|--------------|--------------------------------|--------------------------------|------------------------------|
| EGFR_2327G   | ACGTTGGATGTCCAGGAAGCCTACGTGATG | ACGTTGGATGATGAGCTGCGTGATGAGCTG | TGGACAACCCCCACGTGTGCC        |
| EGFR_2369C_F | ACGTTGGATGTGTTCCCGGACATAGTCCAG | ACGTTGGATGATCTGCCTCACCTCCACCGT | CCACCGTGCACTCATCA            |
| EGFR_2369C_R | ACGTTGGATGATCTGCCTCACCTCCACCGT | ACGTTGGATGTGTTCCCGGACATAGTCCAG | ggggcGCCGAAGGGCATGAGCTGC     |
| EGFR_2560A   | ACGTTGGATGACGTACTGGTGA AACACCG | ACGTTGGATGTCTTTCTCTCCGCACCCAG  | GGCCAGCCCAAATCTG             |
| EGFR_2572C   | ACGTTGGATGTCTTTCTCTCCGCACCCAG  | ACGTTGGATGACGTACTGGTGA AACACCG | gggCAAGATCACAGATTTTGGG       |
| EGFR_2573T_F | ACGTTGGATGTCTTTCTCTCCGCACCCAG  | ACGTTGGATGACGTACTGGTGA AACACCG | ccTGTC AAGATCACAGATTTTGGGC   |
| EGFR_2573T_R | ACGTTGGATGTCTTTCTCTCCGCACCCAG  | ACGTTGGATGACGTACTGGTGA AACACCG | CTTCCGCACCCAGCAGTTTGGCC      |
| EGFR_2582T   | ACGTTGGATGTGGTATTCTTTCTCTCCGC  | ACGTTGGATGAAACACCGCAGCATGTCAAG | TTTTGGGCTGGCCAAAC            |
| ERBB2_2264T  | ACGTTGGATGTGA AAATCCAGTGGCCATC | ACGTTGGATGGGGCTTACGTCTAAGATTTT | GGGATGTGTTTTCCCTC            |
| ERBB2_2305G  | ACGTTGGATGTCCTTCTGTCTCCTAGCA   | ACGTTGGATGGAAAACACATCCCCAAAGC  | CCCAAAGCCAACAAAGAAATCTTA     |
| ERBB2_2329G  | ACGTTGGATGAGAAGGCGGGAGACATATGG | ACGTTGGATGCTTGTCCCCAGGAAGCATA  | AAGCATACGTGATGGCTGGT         |
| FGFR2_1650   | ACGTTGGATGTTTCTCCTACTCACCATCC  | ACGTTGGATGTGAAGATGATTGGGAAACAC | tgGGGAAACACAAGAATATCATAAA    |
| FGFR2_755    | ACGTTGGATGTTCTTCCCTCTCTCCACCAG | ACGTTGGATGACTGTGGAGGCATTGCCG   | gGGATGGGCCGGTGAGGC           |
| FGFR3_1108   | ACGTTGGATGCTGAGGATGCCTGCATACAC | ACGTTGGATGCAACGCCCATGTCTTTGCAG | tggtCTGGTGGAGGCTGACGAGGCC    |
| FGFR3_1118   | ACGTTGGATGAGCTGGTGGAGGCTGACGA  | ACGTTGGATGAGGATGAACAGGAAGAAGCC | cctTAGCTGAGGATGCCTGCA        |
| FGFR3_1948a  | ACGTTGGATGGGACAACGTGATGAAGATCG | ACGTTGGATGAGGCGTCTACTGGCATGA   | gggtGGCCGGGCTCACGTTGGTCGTCT  |
| FGFR3_1948b  | ACGTTGGATGACGTGCACAACCTGACTAC  | ACGTTGGATGTACTGGCATGACCCCCACC  | ccaAGGGCCGGGCTCACGTTGGTCGTCT |
| FGFR3_1949   | ACGTTGGATGGGACAACGTGATGAAGATCG | ACGTTGGATGAGGCGTCTACTGGCATGA   | gggaaGGGCTCACGTTGGTCGTCT     |
| FGFR3_2089   | ACGTTGGATGTCCTCAGCAGCTTGAAGAG  | ACGTTGGATGTGCTCTGGGAGATCTTACG  | GGGGCTCCCCGTACCCC            |
| FGFR3_742    | ACGTTGGATGTGAGCGTCATCTGCCCCCA  | ACGTTGGATGCAGCACCGCCGTCTGGTTG  | GGGCCGGTGCGGGGAGC            |
| FGFR3_746    | ACGTTGGATGAGCGTCATCTGCCCCACA   | ACGTTGGATGCAGCACCGCCGTCTGGTTG  | gacttCAGGATGGGCCGGTGCGGG     |
| FLT3_2503    | ACGTTGGATGCATTGCCCTGACAACATAG  | ACGTTGGATGGGGAAAGTGGTGAAGATATG | gGTGACTTTGATTGGCTCGA         |
| GNAQ_626     | ACGTTGGATGACCTTGAGAATGGTCGATG  | ACGTTGGATGCTCCACGAGAACTTGATCAT | cTTTTCTTCTCTGACCTT           |
| GNAQ_627     | ACGTTGGATGTGCAGAATGGTCGATGTAGG | ACGTTGGATGCTGACTCCACGAGAACTTG  | tATTTTCTTCTCTGACCT           |
| HRAS_181C    | ACGTTGGATGTGTTGGACATCCTGGATACC | ACGTTGGATGATGTACTGGTCCCGCATGG  | tgtTCCCGCATGGCGCTGTACTCCTCT  |
| HRAS_182A    | ACGTTGGATGTGTTGGACATCCTGGATACC | ACGTTGGATGATGTACTGGTCCCGCATGG  | acgccTGGCGCTGTACTCCTCC       |
| HRAS_183G    | ACGTTGGATGTGTTGGACATCCTGGATACC | ACGTTGGATGATGTACTGGTCCCGCATGG  | CATGGCGCTGTACTCCTC           |
| HRAS_35G     | ACGTTGGATGGTTCTGGATCAGCTGGATGG | ACGTTGGATGCGATGACGGAATATAAGCTG | cGCTGGTGGTGGTGGGCGCCG        |
| IDH1_394     | ACGTTGGATGAATATCCCCGGCTTGTGAG  | ACGTTGGATGACATGACTTACTTGATCCCC | ggttATCCCATAAGCATGAC         |
| IDH1_395a    | ACGTTGGATGACATGACTTACTTGATCCCC | ACGTTGGATGAATATCCCCGGCTTGTGAG  | gcTGGGTAAAACCTATCATCATAGGTC  |
| IDH1_395b    | ACGTTGGATGACATGACTTACTTGATCCCC | ACGTTGGATGAATATCCCCGGCTTGTGAG  | cctGTA AACCTATCATCATAGGTC    |
| IDH2_514     | ACGTTGGATGAAAACATCCCACGCCTAGTC | ACGTTGGATGTGGCCTACCTGGTCGCCAT  | cctcCCTGGTCGCCATGGGCGTGCC    |
| IDH2_515     | ACGTTGGATGTGGCCTACCTGGTCGCCAT  | ACGTTGGATGAAAACATCCCACGCCTAGTC | AGCCCATCACCATTGGCA           |
| JAK2_1849    | ACGTTGGATGGTTTTACTTACTCTCGTCTC | ACGTTGGATGTGATGAGCAAGCTTCTCAC  | TGTTTTAAATATGGAGTATGT        |

|                |                                 |                                |                             |
|----------------|---------------------------------|--------------------------------|-----------------------------|
| KIT_1676       | ACGTTGGATGCTGGGAACTCCCATTGTG    | ACGTTGGATGTTTTCCCTTTCTCCCCACAG | ggggTGAAGTACAGTGGAAAGG      |
| KIT_2446       | ACGTTGGATGAGCAGAGAATGGGTACTCAC  | ACGTTGGATGCTTGGCAGCCAGAAATATCC | tttggGATTTTGGTCTAGCCAGA     |
| KIT_2447       | ACGTTGGATGCTTGGCAGCCAGAAATATCC  | ACGTTGGATGAGCAGAGAATGGGTACTCAC | ACATAATTAGAATCATTCTTGATG    |
| KRAS_180T_F    | ACGTTGGATGCATGTACTGGTCCCTCATTG  | ACGTTGGATGTGGAGAAACCTGTCTCTTGG | CTTGGATATTCTCGACACAGCAGG    |
| KRAS_181C      | ACGTTGGATGCATGTACTGGTCCCTCATTG  | ACGTTGGATGTGGAGAAACCTGTCTCTTGG | ggGGATATTCTCGACACAGCAGGT    |
| KRAS_182A      | ACGTTGGATGCATGTACTGGTCCCTCATTG  | ACGTTGGATGTGGAGAAACCTGTCTCTTGG | GATATTCTCGACACAGCAGGTC      |
| KRAS_183A      | ACGTTGGATGTGGAGAAACCTGTCTCTTGG  | ACGTTGGATGCATGTACTGGTCCCTCATTG | CATTGCACTGTACTCCTC          |
| KRAS_34G_R     | ACGTTGGATGAGGCCTGCTGAAAATGACTG  | ACGTTGGATGCTGTATCGTCAAGGCACTC  | ccaatGCACTCTTGCCTACGCCAC    |
| KRAS_34T_35G_F | ACGTTGGATGCTGTATCGTCAAGGCACTC   | ACGTTGGATGAGGCCTGCTGAAAATGACTG | TGGTAGTTGGAGCTT             |
| KRAS_351A      | ACGTTGGATGCTGAAGATGTACCTATGGTC  | ACGTTGGATGTCCTGAGCCTGTTTTGTGTC | TTCTAGAAGGCAAATCACA         |
| KRAS_35G_F     | ACGTTGGATGCTGTATCGTCAAGGCACTC   | ACGTTGGATGAGGCCTGCTGAAAATGACTG | TTGTGGTAGTTGGAGCTG          |
| KRAS_35T_34G_R | ACGTTGGATGCTGTATCGTCAAGGCACTC   | ACGTTGGATGAGGCCTGCTGAAAATGACTG | ACTCTGCCTACGCCAA            |
| KRAS_37G_F     | ACGTTGGATGCTGTATCGTCAAGGCACTC   | ACGTTGGATGAGGCCTGCTGAAAATGACTG | TGGTAGTTGGAGCTGGT           |
| KRAS_38G_F     | ACGTTGGATGCTGTATCGTCAAGGCACTC   | ACGTTGGATGAGGCCTGCTGAAAATGACTG | CTTGTGGTAGTTGGAGCTGGTG      |
| KRAS_436G      | ACGTTGGATGCAGTGTTACTTACCTGTCTTG | ACGTTGGATGGCTCAGGACTTAGCAAGAAG | ttGAATTCCTTTTATTGAAACATCA   |
| KRAS_437C      | ACGTTGGATGGCTCAGGACTTAGCAAGAAG  | ACGTTGGATGTTCAAGTGTACTTACCTGTC | acGTTACTTACCTGTCTTGTCTTT    |
| MAP2K1_167A    | ACGTTGGATGAAAGCGCCTTGAGGCCTTTC  | ACGTTGGATGTCTCAAAGTCGTATCCTTC  | CTCCACCTTCTGCTTC            |
| MAP2K1_171G    | ACGTTGGATGTTGATGAGCAGCAGCGAAAG  | ACGTTGGATGAAGTCGTCATCCTTCAGTTC | AGTTCTCCACCTTCTG            |
| MAP2K1_199G    | ACGTTGGATGTGAACACCACACCGCCATTG  | ACGTTGGATGAGAAGGTGGGAGAACTGAAG | GGAGAACTGAAGGATGAC          |
| MET_3743       | ACGTTGGATGGTTGCTGATTTTGGTCTTGC  | ACGTTGGATGGCAGCTTTCACCTGTTTTG  | GTGTACACTATAGTATTCTTTATCA   |
| MET_3757       | ACGTTGGATGGCAGCTTTCACCTGTTTTG   | ACGTTGGATGGTTGCTGATTTTGGTCTTGC | GCCAGAGACATGTATGATAAAGAATAC |
| MET_3803       | ACGTTGGATGCATCTGACTTGGTGGTAAAC  | ACGTTGGATGAAAACAGGTGCAAAGCTGCC | agtgGCAAAGCTGCCAGTGAAGTGA   |
| NOTCH1_4724    | ACGTTGGATGAGCTGTTGCGCAGCTGCTC   | ACGTTGGATGAGCATGTACCCGAGAGGCTG | GCTGGCGGCCGGCACGC           |
| NOTCH1_4757    | ACGTTGGATGAGCTCCCGCAGGAAGTGAA   | ACGTTGGATGGTGGTGGTGGTCTGATGC   | agtCTGATGCCGCCGGAGCAGC      |
| NOTCH1_4781    | ACGTTGGATGCACGCTTGAAGACCACGTTG  | ACGTTGGATGAGCTGCGCAACAGCTCCTTC | tgCAGCTCCTTCCACTTCC         |
| NOTCH1_4796    | ACGTTGGATGCACGCTTGAAGACCACGTTG  | ACGTTGGATGACAGCTCCTTCCACTTCTG  | gggttACTTCTGCGGGAGCTCAGCC   |
| NOTCH1_4802    | ACGTTGGATGCACGCTTGAAGACCACGTTG  | ACGTTGGATGACAGCTCCTTCCACTTCTG  | ggggCTGCGGGAGCTCAGCCCGTGC   |
| NOTCH1_5036    | ACGTTGGATGTCTGGAAGCACTGCGAGGAG  | ACGTTGGATGATTGTCCGCCAGCTCCAT   | CAGCTCCATCGTCTACC           |
| NOTCH1_7378    | ACGTTGGATGCTGGCGGTGCACACTATTC   | ACGTTGGATGACCAGCGAGGATGGCAGCGA | ccGGGCAGGGCGGGGCTCTCCT      |
| NRAS_181C      | ACGTTGGATGTGTCCTCATGTATTGGTCTC  | ACGTTGGATGGTGAACCTGTTTGTGGAC   | TACTGGATACAGCTGGA           |
| NRAS_181C      | ACGTTGGATGTGTCCTCATGTATTGGTCTC  | ACGTTGGATGGTGAACCTGTTTGTGGAC   | ACATACTGGATACAGCTGGA        |
| NRAS_182A      | ACGTTGGATGGTGAACCTGTTTGTGGAC    | ACGTTGGATGTGTCCTCATGTATTGGTCTC | ctcgCATGGCACTGTACTCTTCT     |
| NRAS_182A      | ACGTTGGATGTGTCCTCATGTATTGGTCTC  | ACGTTGGATGGTGAACCTGTTTGTGGAC   | aTCATGGCACTGTACTCTTCT       |
| NRAS_183A      | ACGTTGGATGGTGAACCTGTTTGTGGAC    | ACGTTGGATGTGTCCTCATGTATTGGTCTC | CATGGCACTGTACTCTTCT         |

|              |                                 |                                |                             |
|--------------|---------------------------------|--------------------------------|-----------------------------|
| NRAS_183A    | ACGTTGGATGGTCAAACCTGTTTGTGGAC   | ACGTTGGATGTGTCCTCATGTATTGGTCTC | ttgtTCTCTCATGGCACTGTACTCTTC |
| NRAS_34G     | ACGTTGGATGAGTGGTTCTGGATTAGCTGG  | ACGTTGGATGGACTGAGTACAAACTGGTGG | caaaTGGTGGTGGTTGGAGCA       |
| NRAS_34G     | ACGTTGGATGGACTGAGTACAAACTGGTGG  | ACGTTGGATGAGTGGTTCTGGATTAGCTGG | tggCAGTGCCTTTTTCCAACACCAC   |
| NRAS_35G     | ACGTTGGATGAGTGGTTCTGGATTAGCTGG  | ACGTTGGATGGACTGAGTACAAACTGGTGG | GGTGGTGGTTGGAGCAG           |
| NRAS_35G     | ACGTTGGATGGACTGAGTACAAACTGGTGG  | ACGTTGGATGAGTGGTTCTGGATTAGCTGG | GGTGGTGGTTGGAGCAG           |
| NRAS_37G     | ACGTTGGATGAGTGGTTCTGGATTAGCTGG  | ACGTTGGATGGACTGAGTACAAACTGGTGG | TGGTGGTTGGAGCAGGT           |
| NRAS_37G     | ACGTTGGATGAGTGGTTCTGGATTAGCTGG  | ACGTTGGATGGACTGAGTACAAACTGGTGG | TGGTGGTTGGAGCAGGT           |
| NRAS_38G     | ACGTTGGATGAGTGGTTCTGGATTAGCTGG  | ACGTTGGATGGACTGAGTACAAACTGGTGG | GGTGGTTGGAGCAGGTG           |
| NRAS_38G     | ACGTTGGATGAGTGGTTCTGGATTAGCTGG  | ACGTTGGATGGACTGAGTACAAACTGGTGG | agaggTTCAGTGCCTTTTTCCAACA   |
| PDGFRA_1682  | ACGTTGGATGATGTCCATCTGGGCTGATTG  | ACGTTGGATGCCTGTCCTGGTCATTTATAG | TGAAATTCGCTGGAGGG           |
| PDGFRA_2525  | ACGTTGGATGAGATCTGTGACTTTGGCCTG  | ACGTTGGATGAAGTGAGGACGTACTGCC   | gggcGTTCGAATCATGCATGATG     |
| PIK3CA_1035T | ACGTTGGATGGCATCAGCATTGACTTTACC  | ACGTTGGATGAAAAATTTCTTGCAACC    | TTTGTCAACCTACGTGAA          |
| PIK3CA_1258T | ACGTTGGATGGTTTTATAATTTAGACTAGTG | ACGTTGGATGAGTTTATATTTCCCATGCC  | TTTCCCATGCCAATGGAC          |
| PIK3CA_1624G | ACGTTGGATGTAGCACTTACCTGTGACTCC  | ACGTTGGATGGCAATTTCTACACGAGATCC | TTTCTACACGAGATCCTCTCTCT     |
| PIK3CA_1633G | ACGTTGGATGTACACGAGATCCTCTCTCTG  | ACGTTGGATGTAGCACTTACCTGTGACTCC | ATAGAAAATCTTTCTCTGCT        |
| PIK3CA_1634A | ACGTTGGATGTAGCACTTACCTGTGACTCC  | ACGTTGGATGGCAATTTCTACACGAGATCC | CCTCTCTCTGAAATCACTG         |
| PIK3CA_1635G | ACGTTGGATGTAGCACTTACCTGTGACTCC  | ACGTTGGATGGCAATTTCTACACGAGATCC | cTCCTCTCTGAAATCACTGA        |
| PIK3CA_263G  | ACGTTGGATGTAACAAGAAGCAGAAAGGG   | ACGTTGGATGGGTTGAAAAAGCCGAAGGTC | gTGAAAAAGCCGAAGGTCACAAAGT   |
| PIK3CA_3129G | ACGTTGGATGAACTGAGCAAGAGGCTTTGG  | ACGTTGGATGTCCATTTTTGTTGTCCAGCC | aACCATGATGTGCATCATT         |
| PIK3CA_3139C | ACGTTGGATGAACTGAGCAAGAGGCTTTGG  | ACGTTGGATGTCCATTTTTGTTGTCCAGCC | cTTGTCCAGCCACCATGAT         |
| PIK3CA_3140A | ACGTTGGATGTCCATTTTTGTTGTCCAGCC  | ACGTTGGATGAACTGAGCAAGAGGCTTTGG | TCATGAAACAATGAATGATGCAC     |
| PIK3R1_1678  | ACGTTGGATGTTTCTCAGCTGGATAAGGTC  | ACGTTGGATGAAGCAGGCAGCTGAGTATCG | CAGCTGAGTATCGAGAAATT        |
| PIK3R1_1692  | ACGTTGGATGAAGCAGGCAGCTGAGTATCG  | ACGTTGGATGTTTCTCAGCTGGATAAGGTC | TAAGGTCTGGTTAATGCT          |
| PTPN11_179   | ACGTTGGATGTTCTCCCCTCCATACAGGTC  | ACGTTGGATGAAGAAATGGAGCTGTCACCC | acaCACATCAAGATTCAGAACACTG   |
| PTPN11_181   | ACGTTGGATGTTCTCCCCTCCATACAGGTC  | ACGTTGGATGATGGAGCTGTCACCCACATC | AGATTCAGAACACTGGT           |
| PTPN11_182   | ACGTTGGATGAAGAAATGGAGCTGTCACCC  | ACGTTGGATGTTCTCCCCTCCATACAGGTC | CCCCTCCATACAGGTCATAGTAA     |
| PTPN11_214   | ACGTTGGATGTGCCCGTGATGTTCCATGTA  | ACGTTGGATGACTATGACCTGTATGGAGGG | tggATGGAGGGGAGAAATTT        |
| PTPN11_226   | ACGTTGGATGTGCCCGTGATGTTCCATGTA  | ACGTTGGATGACTATGACCTGTATGGAGGG | ggggtGGAGAAATTTGCCACTTTGGCT |
| PTPN11_227   | ACGTTGGATGACTATGACCTGTATGGAGGG  | ACGTTGGATGTTAATTGCCCGTGATGTTCC | TTCCATGTAATACTGGACCAAC      |
| PTPN11_455   | ACGTTGGATGTTGCTCTCCCCTTTGTCATC  | ACGTTGGATGTTCTGTACGAGAGAGCCAG  | atgtAGATTTTGTCTTTCTGTGC     |
| RET_2753     | ACGTTGGATGCATCACTTTGCGTGGTGTAG  | ACGTTGGATGTCTTTAGGGTCGGATTCCAG | tgAGGGTCGGATTCCAGTTAAATGGA  |
| SMO_1604     | ACGTTGGATGACCAGGTACGCCTCCAGATG  | ACGTTGGATGCATGTTTGAAGTGGCATCG  | TGGCATCGCCATGAGCACCT        |
| SMO_1918     | ACGTTGGATGCCATACTGCCCCAGGATATT  | ACGTTGGATGCTTCTCCAGAAGCTTGAAC  | ggtcCCTGGAGTTGCCACAGGGG     |
| SMO_595      | ACGTTGGATGAGTTCAACAGTTCAGGCCAG  | ACGTTGGATGACGTCCTCGTACCAGCTCTT | CTTGGGGTTGTCTGTCC           |

Supplemental Table 4. Primers used for amplification of FGFR4 and CTNNB1 exons.

| gene   | Forward Primer ID                          | Forward Primer Sequence  | Reverse Primer ID                          | Reverse Primer Sequence   |
|--------|--------------------------------------------|--------------------------|--------------------------------------------|---------------------------|
| CTNNB1 | CTNNB1_153648_L_6262139_chr3_41240936_FFPE | CAATGGGTCATATCACAGATTCTT | CTNNB1_153648_R_6262140_chr3_41241286_FFPE | TGACTTTCAGTAAGGCAATGAAAA  |
| CTNNB1 | CTNNB1_153649_L_6262169_chr3_41241108_FFPE | GAATCCATTCTGGTGCCACT     | CTNNB1_153649_R_6262170_chr3_41241353_FFPE | TTTTCTTCACCACAACATTTTATTT |
| CTNNB1 | CTNNB1_91709_L_9805086_chr3_41240700_20    | TCACTGAGCTAACCCCTGGCT    | CTNNB1_91709_R_9805087_chr3_41241779_21    | TCCACAGTTCAGCATTACCT      |
| FGFR4  | FGFR4_130022_L_8823624_chr5_176448806_20   | GGCCTTAGGCTCTGGCTACT     | FGFR4_130022_R_8823625_chr5_176449583_20   | ATCCTTCCAGCTTTGCTCA       |
| FGFR4  | FGFR4_130025_L_9694020_chr5_176449714_20   | TGTGTGGGTGTCAAGGAGTG     | FGFR4_130025_R_9694021_chr5_176450703_20   | TGCTGGAGGTCAAGGAGTCT      |
| FGFR4  | FGFR4_130030_L_9783666_chr5_176450189_20   | TCTAGCAGGGAGTGAAGGGA     | FGFR4_130030_R_9783667_chr5_176451368_20   | TAGCAGAAGGGGAACAGAG       |
| FGFR4  | FGFR4_130033_L_10235316_chr5_176451117_20  | GTGGGCAGGATGAGGATCTA     | FGFR4_130033_R_10235317_chr5_176451808_20  | CCACACTAACCCCTGTGCTT      |
| FGFR4  | FGFR4_130038_L_10561130_chr5_176451659_20  | AGCAGGGTAAGCAGGAGACA     | FGFR4_130038_R_10561131_chr5_176452606_20  | GGACTCCACCTCTGAGCTA       |
| FGFR4  | FGFR4_130041_L_11389048_chr5_176451936_20  | TTTCCCCTATGTGCAAGTCC     | FGFR4_130041_R_11389049_chr5_176452685_20  | CACAGGCCAACAGAGACTGA      |
| FGFR4  | FGFR4_130042_L_8941514_chr5_176452456_20   | CCTGGGACTGGCATAACTA      | FGFR4_130042_R_8941515_chr5_176453745_20   | CAGCCTGGAGATGGAGAAAG      |
| FGFR4  | FGFR4_130045_L_11650826_chr5_176452893_20  | GCAGTTCTCCCTGGAGTCAG     | FGFR4_130045_R_11650827_chr5_176453364_20  | CAGCCTGGAGATGGAGAAAG      |
| FGFR4  | FGFR4_130046_L_15490357_chr5_176452928_    | tgcaccactatgggagttc      | FGFR4_130046_R_15490358_chr5_176453254_    | tcgaaattctggattcaagc      |
| FGFR4  | FGFR4_130051_L_10369746_chr5_176454680_20  | CAGCCTAGCAAGGATTACAGC    | FGFR4_130051_R_10369747_chr5_176455355_20  | GCACTCCACGATCACGTACA      |
| FGFR4  | FGFR4_130053_L_11492036_chr5_176454891_20  | TCATCAACTGCTTGGTGTC      | FGFR4_130053_R_11492037_chr5_176455648_20  | GGAGAAGTCGGGACATTGAA      |
| FGFR4  | FGFR4_130056_L_10978760_chr5_176455453_20  | TCTGTAAAGTGGGTGGAGGG     | FGFR4_130056_R_10978761_chr5_176456192_20  | GTACACCCGGTCAAACAAGG      |
| FGFR4  | FGFR4_130060_L_10307596_chr5_176455495_20  | GTGCTGGTGACTGAGGACAA     | FGFR4_130060_R_10307597_chr5_176456220_20  | CCCAGACCAAATCTGAAGGA      |
| FGFR4  | FGFR4_130061_L_10657860_chr5_176455906_20  | CCTTCAGATTGGTCTGGGA      | FGFR4_130061_R_10657861_chr5_176456705_20  | AAGAGGAGGAGGAGGACGAG      |
| FGFR4  | FGFR4_130066_L_10017316_chr5_176456694_20  | TCAAACCTCCCACTCAAGCA     | FGFR4_130066_R_10017317_chr5_176457397_20  | AATAGGGTCCGAAGGTCAGG      |
| FGFR4  | FGFR4_130069_L_10799800_chr5_176456745_20  | CAGAGGCTACCTTCAAGCA      | FGFR4_130069_R_10799801_chr5_176457994_20  | GAACCTCTGCTGGTATTGG       |
| FGFR4  | FGFR4_214602_L_7486413_chr5_176449091_FFPE | aaaataagggaagAGCCCC      | FGFR4_214602_R_7486414_chr5_176449390_FFPE | ATCCTTCCAGCTTTGCTCA       |
| FGFR4  | FGFR4_214609_L_7486453_chr5_176449917_FFPE | TGTGCGGTGTGTTCTTTGTA     | FGFR4_214609_R_7486454_chr5_176450249_FFPE | AGGTGAGATTCTGCAGGACG      |
| FGFR4  | FGFR4_214610_L_7486473_chr5_176450093_FFPE | GTGGCCACTGGTACAAGGA      | FGFR4_214610_R_7486474_chr5_176450344_FFPE | GGGACAGAGGAAGCATCTA       |
| FGFR4  | FGFR4_214620_L_7486513_chr5_176450272_FFPE | TAGCAGGGAGTGAAGGGATG     | FGFR4_214620_R_7486514_chr5_176450592_FFPE | TGCATGCAGTTTCTCTCCA       |
| FGFR4  | FGFR4_214621_L_7486579_chr5_176450424_FFPE | CCCAGCAAGGTCAGTAGGTC     | FGFR4_214621_R_7486580_chr5_176450771_FFPE | GGGGACTGATGAAGGAATGA      |
| FGFR4  | FGFR4_214622_L_7486619_chr5_176450601_FFPE | GGGAACACCGTCAAGTTCC      | FGFR4_214622_R_7486620_chr5_176450786_FFPE | TGCTTGTAGGTATGAGGGGAC     |
| FGFR4  | FGFR4_214625_L_7486633_chr5_176451217_FFPE | GGATCTAGCCTCTGGTCTCT     | FGFR4_214625_R_7486634_chr5_176451515_FFPE | CATCTGAGTCCATCCTGCCT      |
| FGFR4  | FGFR4_214630_L_7486683_chr5_176451841_FFPE | TTGAACTTGAGGAAGGCTGG     | FGFR4_214630_R_7486684_chr5_176452172_FFPE | ACCAAGGTGGGAGAAGAAT       |
| FGFR4  | FGFR4_214631_L_7486703_chr5_176452002_FFPE | GAGCTGCTGTGCAAGGTGTA     | FGFR4_214631_R_7486704_chr5_176452197_FFPE | AACAGGGAAGCTGGGGAG        |
| FGFR4  | FGFR4_214634_L_7486723_chr5_176452152_FFPE | ATTCTTCTCCACCTTGGGT      | FGFR4_214634_R_7486724_chr5_176452485_FFPE | GGCCAACAGAGACTGACCAC      |
| FGFR4  | FGFR4_214638_L_7486763_chr5_176452659_FFPE | GGGAGGGACTGAGTTAGGGT     | FGFR4_214638_R_7486764_chr5_176453001_FFPE | AGACTTGGTTCTGCCTGCTG      |
| FGFR4  | FGFR4_214639_L_7486773_chr5_176452824_FFPE | CTTGCTGTGCTCCTGCT        | FGFR4_214639_R_7486774_chr5_176453150_FFPE | GGGAACTCCATAGTGGGTC       |
| FGFR4  | FGFR4_214640_L_7486793_chr5_176452999_FFPE | CTCCACTTTCAGTTCTCC       | FGFR4_214640_R_7486794_chr5_176453253_FFPE | GGAGAAAGTCCAGCCTCAGA      |

|       |                                            |                       |                                            |                      |
|-------|--------------------------------------------|-----------------------|--------------------------------------------|----------------------|
| FGFR4 | FGFR4_214643_L_chr5_176453157_FFPE         | aggtgctgctgagctgtgt   | FGFR4_214643_R_chr5_176453385_FFPE         | cacctttgagcatcttgacg |
| FGFR4 | FGFR4_214646_L_7486813_chr5_176454873_FFPE | gcctctGCATGCTCCCT     | FGFR4_214646_R_7486814_chr5_176455118_FFPE | GTGGAGAGGCTGCCAAAG   |
| FGFR4 | FGFR4_214651_L_7486853_chr5_176455076_FFPE | GGCCGTTAGGGTG CAGA    | FGFR4_214651_R_7486854_chr5_176455369_FFPE | GAGAGACTGAGAGGGGCTCA |
| FGFR4 | FGFR4_214652_L_7486893_chr5_176455238_FFPE | CCTCGGAGCAGTGAGGG     | FGFR4_214652_R_7486894_chr5_176455414_FFPE | GGAGAAGTCGGGACATTGAA |
| FGFR4 | FGFR4_214655_L_7486913_chr5_176455558_FFPE | tctgtaaagtggtGGAGGG   | FGFR4_214655_R_7486914_chr5_176455868_FFPE | AGAGTCCCACAGGTCCTCG  |
| FGFR4 | FGFR4_214658_L_7486943_chr5_176455793_FFPE | GAGATGGGGCAGAACTGGAT  | FGFR4_214658_R_7486944_chr5_176456070_FFPE | CAAATCTGAAGGAGCCCTCG |
| FGFR4 | FGFR4_214661_L_7486959_chr5_176456117_FFPE | ACAGCTGTGGTGGGTCATGT  | FGFR4_214661_R_7486960_chr5_176456448_FFPE | TAGTGTGTCTCTTGCCG    |
| FGFR4 | FGFR4_214664_L_7487013_chr5_176456794_FFPE | CATCAAAC TCCCCACCAAAC | FGFR4_214664_R_7487014_chr5_176457071_FFPE | CGGTCAGGCCAGATGAG    |
| FGFR4 | FGFR4_214673_L_7487039_chr5_176457032_FFPE | CTCTGCCTGCTCCCTC      | FGFR4_214673_R_7487040_chr5_176457379_FFPE | CCCATGCTATCAAGGTCGAG |

Supplemental Table 5. Primers used in Sanger Sequencing of all identified mutations.

| <b>Mutation ID</b> | <b>Forward Primer</b>                   | <b>Reverse Primer</b>                    |
|--------------------|-----------------------------------------|------------------------------------------|
| BRAF_1783          | tgtaaacgacggccagtTGCTTGCTCTGATAGGAAAATG | caggaaacagctatgaccTCAGGGCCAAAAATTTAATCAG |
| BRAF_1799          | tgtaaacgacggccagtTGCTTGCTCTGATAGGAAAATG | caggaaacagctatgaccTCAGGGCCAAAAATTTAATCAG |
| CTNNB1_121         | TTTGATGGAGTTGGACATGG                    | GGCAATGAAAAATAATACTCTTACCA               |
| CTNNB1_134         | TTTGATGGAGTTGGACATGG                    | GGCAATGAAAAATAATACTCTTACCA               |
| FGFR4_1648         | GTTAGGGTGCAGAGCCAAAG                    | CGGGACTCCAGATACTGCAT                     |
| HRAS_181           | AGAGGCTGGCTGTGTGAACT                    | TCACGGGGTTCACCTGTACT                     |
| HRAS_183           | AGAGGCTGGCTGTGTGAACT                    | TCACGGGGTTCACCTGTACT                     |
| KRAS_35            | GTGTGACATGTTCTAATATAGTCA                | CTGTATCAAAGAATGGTCCTGCAC                 |
| KRAS_38            | GTGTGACATGTTCTAATATAGTCA                | CTGTATCAAAGAATGGTCCTGCAC                 |
| MAP2K1_171         | tgtaaacgacggccagtGGAACAGGACCAACTTGGAG   | caggaaacagctatgaccGcTTGTGGGAGACCTTGAAC   |
| NRAS_181           | CCCCTTACCCTCCACACC                      | CACAAAGATCATCCTTTCAGAGAA                 |
| NRAS_183           | CCCCTTACCCTCCACACC                      | CACAAAGATCATCCTTTCAGAGAA                 |
| PIK3CA_1624        | TTGAAAATGTATTTGCTTTTTCTGT               | ACATGCTGAGATCAGCCAAA                     |
| PIK3CA_1633        | TTGAAAATGTATTTGCTTTTTCTGT               | ACATGCTGAGATCAGCCAAA                     |
| PIK3CA_3140        | tgtaaacgacggccagtCTCAATGATGCTTGGCTCTG   | caggaaacagctatgaccTGGAATCCAGAGTGAGCTTTC  |
| PTPN11_226         | CCTTGCCTCCCTTCCAAT                      | TCTGACACTCAGGGCACAAG                     |



Supplemental Table 6. Clinical characteristics of tumor samples with identified mutations.

| Sample ID | Tumor | Mutation                                 | Age at Diagnosis | Sex | Primary Site          | Stage                   | Outcome |
|-----------|-------|------------------------------------------|------------------|-----|-----------------------|-------------------------|---------|
| R71       | ARMS  | KRAS_38G>A (G13D)                        | 3                | F   | Gluteal               | 3 (Group III)           | DOD     |
| R1        | ERMS  | PIK3CA_1624G>A (E542K)                   | 14               | F   | Infratemporal Fossa   | 3 (Group III)           | DOD     |
| R6        | ERMS  | FGFR4_1648G>C (V550L)                    | 5                | M   | Paratesticular        | 1 (Group I)             | Alive   |
| R7        | ERMS  | CTNNB1_134C>A (S45Y)                     | 3                | F   | Perineum              | 2 (Group II)            | Alive   |
| R11       | ERMS  | CTNNB1_121A>G (T41A), NRAS_181C>A (Q61K) | 10 months        | M   | Pelvis                | 4                       | Alive   |
| R13       | ERMS  | FGFR4_1648G>C (V550L)                    | 21               | F   | Chest Wall            | 4                       | DOD     |
| R29       | ERMS  | NRAS_181C>A (Q61K)                       | 18               | M   | Anterior Mediastinum  | 4                       | Alive   |
| R31       | ERMS  | FGFR4_1648G>C (V550L)                    |                  |     | Cell line             |                         |         |
| R33       | ERMS  | PTPN11_226G>C (E76Q)                     | 3                | M   | Bladder               | 3 (Group III)           |         |
| R35       | ERMS  | NRAS_183A>T (Q61H)                       |                  |     | Cell line             |                         |         |
| R36       | ERMS  | FGFR4_1648G>C (V550L)                    | 11               | M   | Neck                  | 4                       | DOD     |
| R43       | ERMS  | PIK3CA_1633G>A (E545K)                   | 13               | F   | Hemi-diaphragm        | 3 (Group III)           | DOD     |
| R44       | ERMS  | NRAS_181C>A (Q61K)                       | 17               | M   | Pelvis                | 4                       | DOD     |
| R48       | ERMS  | PIK3CA_3140A>G (H1047R)                  | 37               | M   | Pterygopalatine Fossa | 3 (Group III)           | DOD     |
| R50       | ERMS  | KRAS_35G>A (G12D)                        | 1                | M   | Pelvis                | 4                       | DOD     |
| R51       | ERMS  | HRAS_181C>A (Q61K)                       |                  |     | Cell line             |                         |         |
| R60       | ERMS  | BRAF_1799T>A (V600E)                     | 27               | M   | Femur                 | information unavailable | DOD     |
| R61       | ERMS  | KRAS_34G>T (G12C)                        | 2                | M   | Retroperitoneum       | 3 (Group III)           | DOD     |
| ES2       | ES    | BRAF_1799T>A (V600E)                     |                  |     | Cell line             |                         |         |
| ES9       | ES    | CTNNB1_133_135delTCT (S45del)            | 14               | M   | Pelvis                | 4                       | DOD     |
| ES17      | ES    | NRAS_181C>A (Q61K)                       | 32               | M   | Scapula               | 4                       | DOD     |
| NB2       | NB    | ALK_3824G>A (R1275Q)                     | 2                | M   | Adrenal               | 4                       | DOD     |
| NB3       | NB    | ALK_3522C>A (F1174L)                     | 1                | M   | Adrenal               | 4                       | DOD     |
| NB10      | NB    | ALK_3520T>C (F1174L)                     | 11               | F   | Posterior mediastinum | 4                       | Alive   |
| NB12      | NB    | ALK_3733T>G (F1245V)                     | 3                | M   | Adrenal               | 3                       | Alive   |
| NB23      | NB    | KRAS_35G>T (G12V)                        | 3                | M   | Adrenal               | 4                       | DOD     |
| NB30      | NB    | ALK_3522C>A (F1174L)                     | 5                | M   | Adrenal               | 4                       | DOD     |
| NB32      | NB    | BRAF_1783T>C (F595L)                     | 14               | M   | Adrenal               | 4                       | DOD     |
| NB39      | NB    | ALK_3522C>A (F1174L)                     | 5                | F   | Adrenal               | 4                       | DOD     |
| NB44      | NB    | ALK_3824G>A (R1275Q)                     | 4                | M   | Adrenal               | 4                       | DOD     |
| NB54      | NB    | ALK_3522C>A (F1174L)                     | 1                | M   | Adrenal               | 4                       | DOD     |
| NB58      | NB    | ALK_3521T>G (F1174C)                     | 6                | F   | Adrenal               | 4                       | DOD     |

|       |    |                      |           |   |                       |   |       |
|-------|----|----------------------|-----------|---|-----------------------|---|-------|
| NB62  | NB | ALK_3734T>G (F1245C) | 29        | F | Retroperitoneal       | 4 | DOD   |
| NB81  | NB | ALK_3520T>C (F1174L) | 19        | F | Adrenal               | 4 | DOD   |
| NB83  | NB | ALK_3520T>C (F1174L) | 6         | F | Adrenal               | 1 | Alive |
| NB109 | NB | ALK_3824G>A (R1275Q) | 1         | F | Paraspinal            | 2 | Alive |
| NB129 | NB | ALK_3824G>A (R1275Q) | 4         | M | Posterior mediastinum | 4 | DOD   |
| NB134 | NB | ALK_3824G>A (R1275Q) | 6 weeks   | M | Adrenal               | 3 | Alive |
| NB135 | NB | ALK_3824G>A (R1275Q) | 1         | M | Adrenal               | 4 | Alive |
| NB139 | NB | MAP2K1_171G>T (K57N) | 2         | F | Pre-sacral            | 3 | Alive |
| NB151 | NB | NRAS_181C>A (Q61K)   | 6         | M | Adrenal               | 4 | DOD   |
| NB158 | NB | BRAF_1799T>A (V600E) | 11 months | M | Adrenal               | 3 | Alive |
| NB171 | NB | ALK_3824G>A (R1275Q) | 8         | F | Adrenal               | 4 | Alive |
| NB174 | NB | ALK_3522C>A (F1174L) | 2         | M | Adrenal               | 4 | DOD   |
| NB188 | NB | ALK_3522C>A (F1174L) | 5         | M | Adrenal               | 4 | DOD   |
| NB191 | NB | ALK_3522C>A (F1174L) | 2         | M | Adrenal               | 4 | DOD   |
